# Supplementary material
Source: PubMed Central journal article supplement (PMC4076404)
Supplement: supp_113.113316_113316SupData.pdf [file supp_113.113316_113316SupData.pdf]

|                                               | WT             | $\beta$ ERKO   |
|-----------------------------------------------|----------------|----------------|
| N                                             | 17             | 20             |
| Number of animals with                        |                |                |
| 0 litters                                     | 0              | 7 (35%)        |
| 1 litters                                     | 0              | 8 (40%)        |
| 2 litters                                     | 3 (18%)        | 3 (15%)        |
| 3 litters                                     | 4 (23%)        | 1 (5%)         |
| 4 litters                                     | 7 (41%)        | 1 (5%)         |
| 5 litters                                     | 3 (18%)        | 0              |
| Average number of litters/animal ( $\pm$ SEM) | 3.6 $\pm$ 0.2  | 1.1 $\pm$ 0.2* |
| Average number of pups/litter ( $\pm$ SEM)    | 8.6 $\pm$ 0.4  | 2.8 $\pm$ 0.2* |
| Average number of pups/dam ( $\pm$ SEM)       | 30.5 $\pm$ 2.4 | 3.0 $\pm$ 0.8* |

\* Different from WT;  $p < 0.001$  by unpaired 2-sided t-test.

### Supplemental Table S1

|                                | WT<br>in WT    |      | $\beta$ ERKO<br>in WT |      | WT<br>in $\beta$ ERKO |      | $\alpha$ ERKO<br>in WT |      | WT<br>in $\alpha$ ERKO |       |
|--------------------------------|----------------|------|-----------------------|------|-----------------------|------|------------------------|------|------------------------|-------|
| N                              | 20             |      | 21                    |      | 18                    |      | 13                     |      | 10                     |       |
| Number of animals with         |                | %    |                       | %    |                       | %    |                        | %    |                        | %     |
| 0 litters                      | 2              | 10.0 | 17                    | 81.0 | 3                     | 16.7 | 11                     | 84.6 | 10                     | 100.0 |
| 1 litters                      | 0              | 0.0  | 2                     | 9.5  | 1                     | 5.6  | 1                      | 7.7  | 0                      | 0.0   |
| 2 litters                      | 12             | 60.0 | 1                     | 4.8  | 4                     | 22.2 | 0                      | 0.0  | 0                      | 0.0   |
| 3 litters                      | 6              | 30.0 | 1                     | 4.8  | 10                    | 55.6 | 1                      | 7.7  | 0                      | 0.0   |
| average # litters/animal (SEM) | 2.1 $\pm$ 0.2  |      | 0.3 $\pm$ 0.2*        |      | 2.2 $\pm$ 0.3         |      | 0.3 $\pm$ 0.2*         |      | 0*                     |       |
| average # pups/litter (SEM)    | 4.4 $\pm$ 0.5  |      | 0.7 $\pm$ 0.3*        |      | 4.2 $\pm$ 0.6         |      | 0.6 $\pm$ 0.5*         |      | 0*                     |       |
| average # pups/dam             | 10.4 $\pm$ 1.3 |      | 1.2 $\pm$ 0.8*        |      | 11.2 $\pm$ 1.7        |      | 1.5 $\pm$ 1.2*         |      | 0*                     |       |

\* Different than WT;  $p < 0.05$  by One-way ANOVA with Tukey's multiple comparison post-test.

### Supplemental Table S2

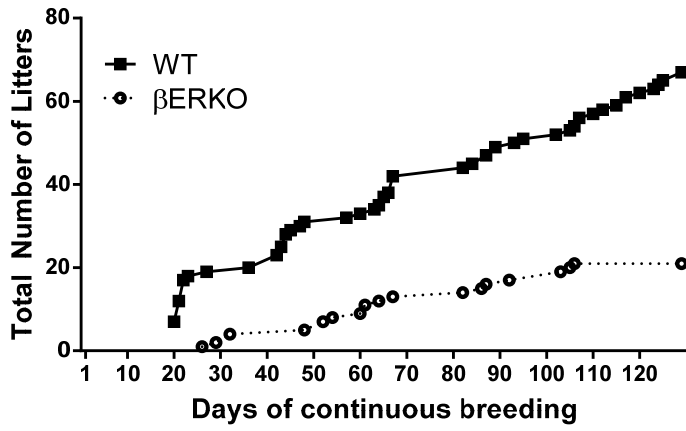

Supplemental Figure S1

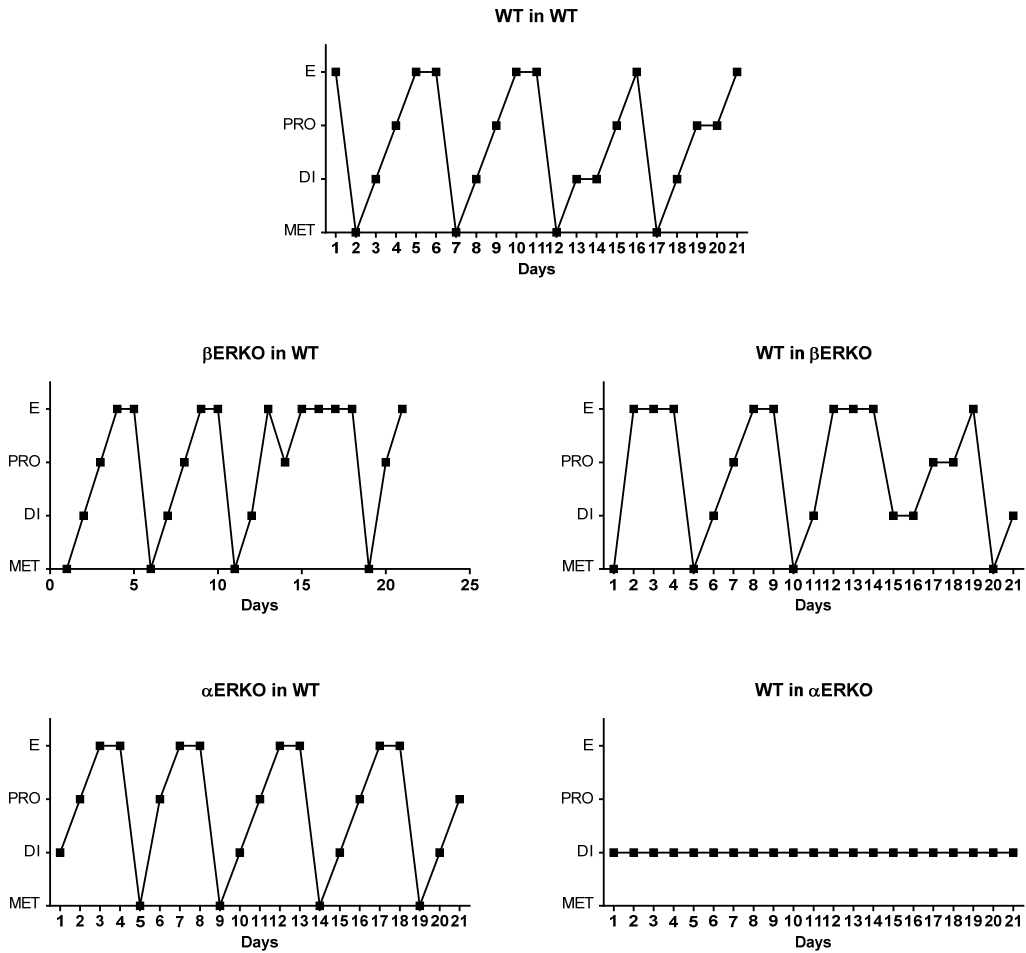

Supplemental Figure S2

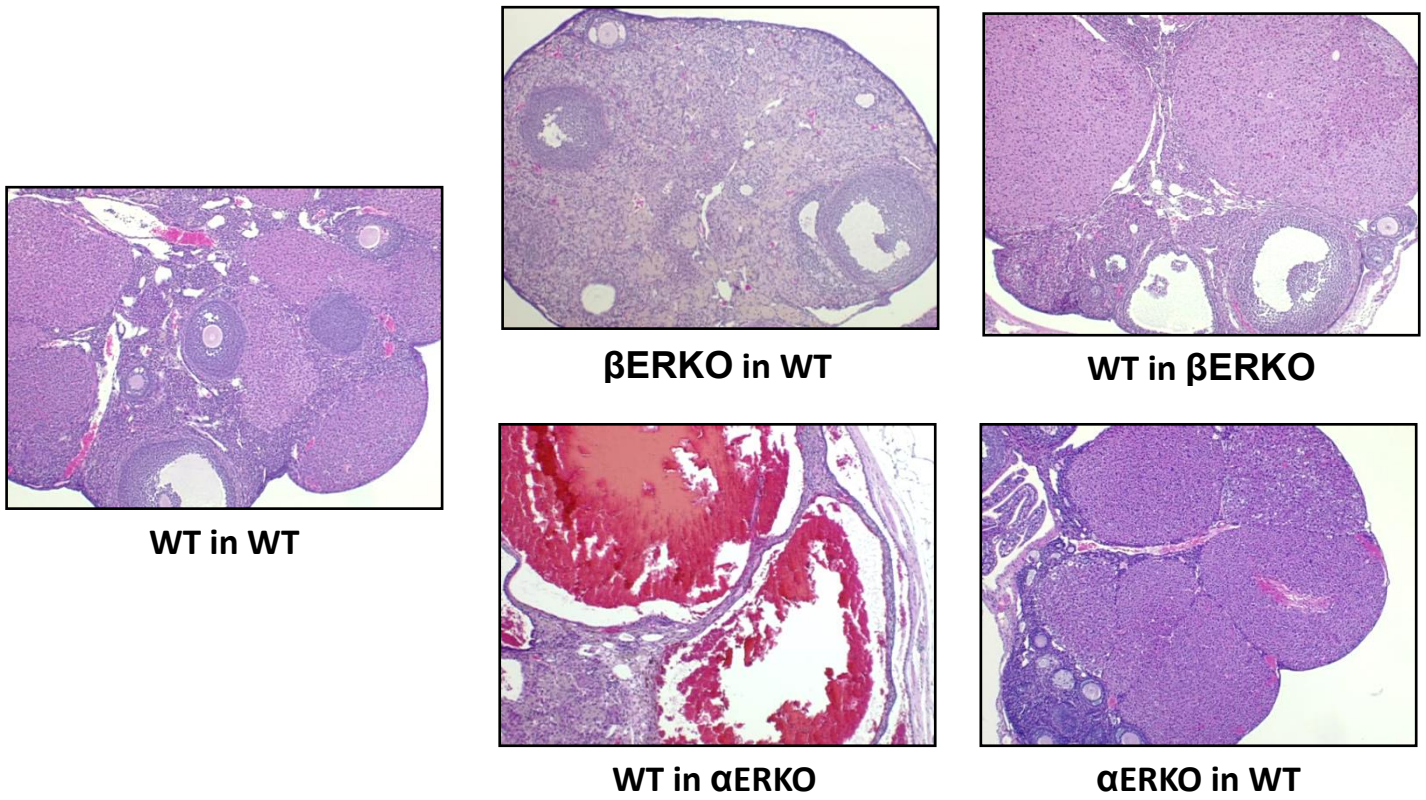

Supplemental Figure S3
